# Supplementary material
Source: Research Square preprint supplement (doi:10.21203/rs.3.rs-9170631/v1)
Supplement: Supplementary file 1 [file 6f8346bafc0ed61f3c126719.docx]

Supporting Information

**Rigidifying Symmetry-Broken Cu4I4 Clusters with Hydrogen-Bonded Frameworks Enables Fast and High Light Yield Scintillation for Real-Time Dynamic X-ray Imaging and 3D Tomographic Reconstruction**

Mengzhu Wang,1 Siwen Zou,1 Ning Ding,1 Yongjing Deng,1 Feiyang Li,3 Pengfei She,1,2* Jiangang Li,1 Yongkang Zhu,1 Yun Ma1,2* and Qiang Zhao1*

**Table S1.** DetailedSingle crystal X-ray data of Cu4I4(TFP)4 and Cu4I4(TFP)3CH3CN.

| Complex | Cu4I4(TFP)4 | Cu4I4(TFP)3CH3CN |
| --- | --- | --- |
| Formula Weight | 1690.41 | 1499.30 |
| CCDC Number | 2482226 | 2482227 |
| Crystal System | Cubic | Trigonal |
| Space Group | *F-43c* | *P -3c1* |
| *a* (Å) | 22.3779(5) | 13.5636(5) |
| *b* (Å) | 22.3779(5) | 13.5636(5) |
| *c* (Å) | c=22.3779(5) | 31.4440(12) |
| *α* (o) | 90 | 90 |
| *β* (o) | 90 | 90 |
| *γ* (o) | 90 | 120 |
| *V* (Å3 ) | 11206.2(8) | 5009.8(4) |
| *Z* value | 8 | 4 |
| *D*(calcd) (g cm-3) | 2.004 | 1.988 |
| Temperature (*K*) | 193 | 273 |
| *F*(000) | 6464.0 | 2840.0 |
| *μ* (mm-1) | 3.872 | 4.283 |
| R1/wR2  [I>2σ(I)] | R1 = 0.0564  wR2 = 0.1625 | R1 = 0.0567  wR2 = 0.1626 |
| R1/wR2  [all data] | R1 = 0.0931  wR2 = 0.1806 | R1 = 0.0938  wR2 = 0.1894 |
| GOF | 1.064 | 1.033 |

Figure S1. Comparison of experimental (black trace) and simulated (red trace) PXRD patterns for Cu4I4(TFP)4.

Figure S2. Comparison of experimental (black trace) and simulated (red trace) PXRD patterns for Cu4I4(TFP)3CH3CN.


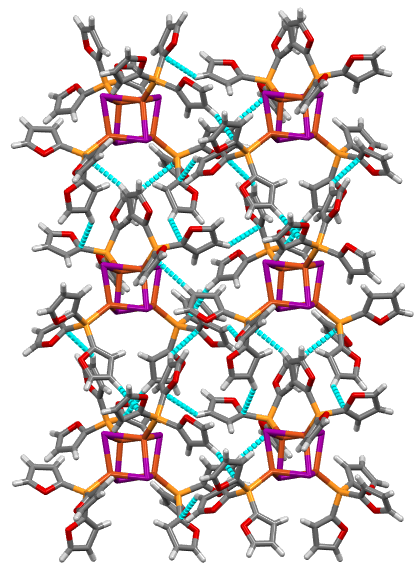


Figure S3. C-H···π stacking in Cu4I4(TFP)4.


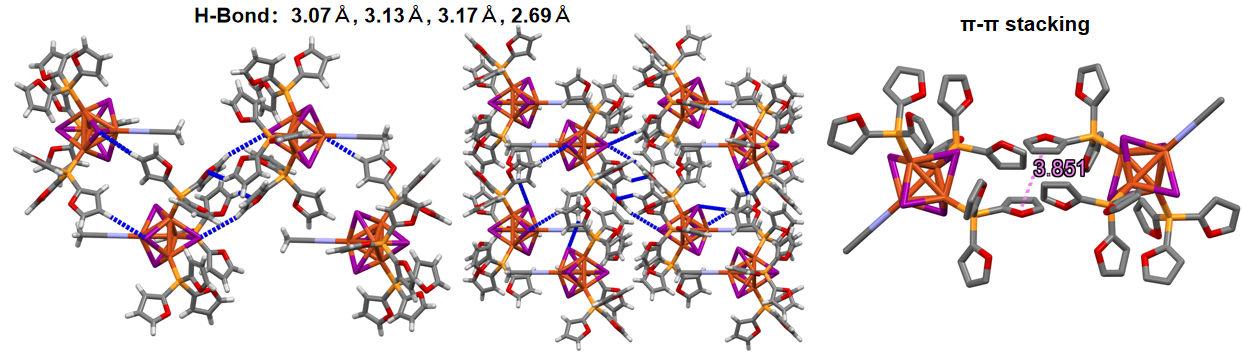


Figure S4. H-Bond and π···π stacking in Cu4I4(TFP)3CH3CN.


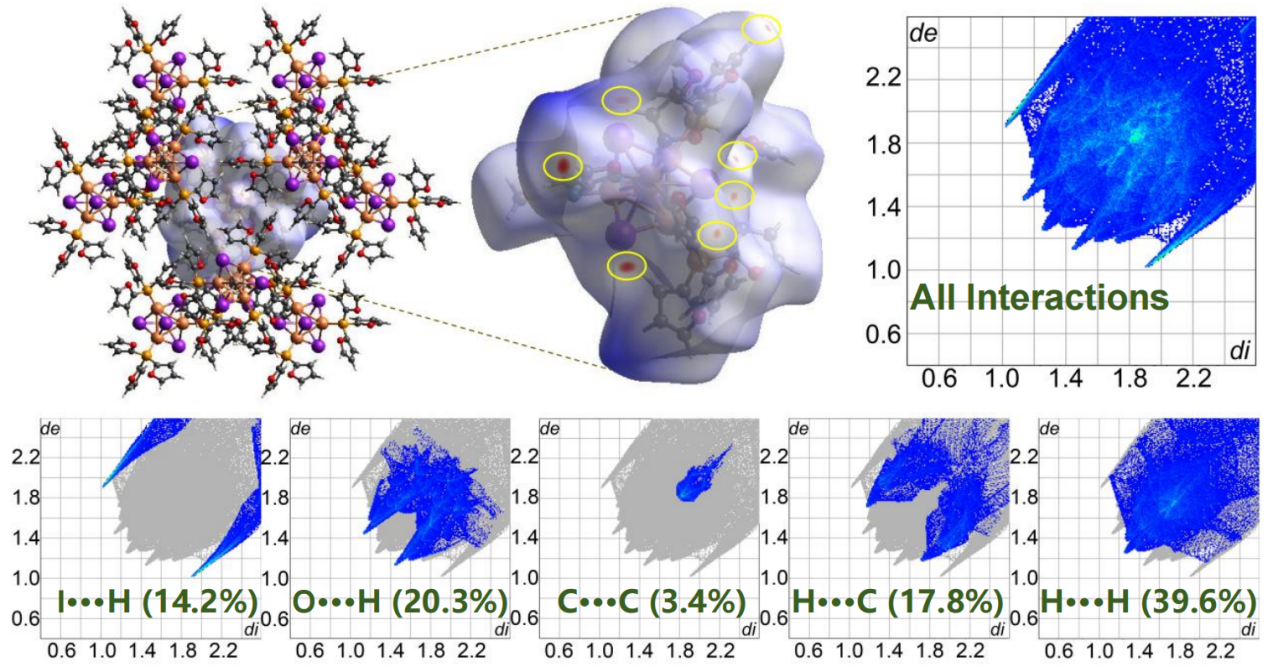


Figure S5. Hirshfeld surfaces of Cu4I4(TFP)3CH3CN: Simulation of a Hirshfeld surface of one building block; 2D fingerprint plot generated by Hirshfeld surface; and relative contributions of various intermolecular interactions to the Hirshfeld surface ratio.


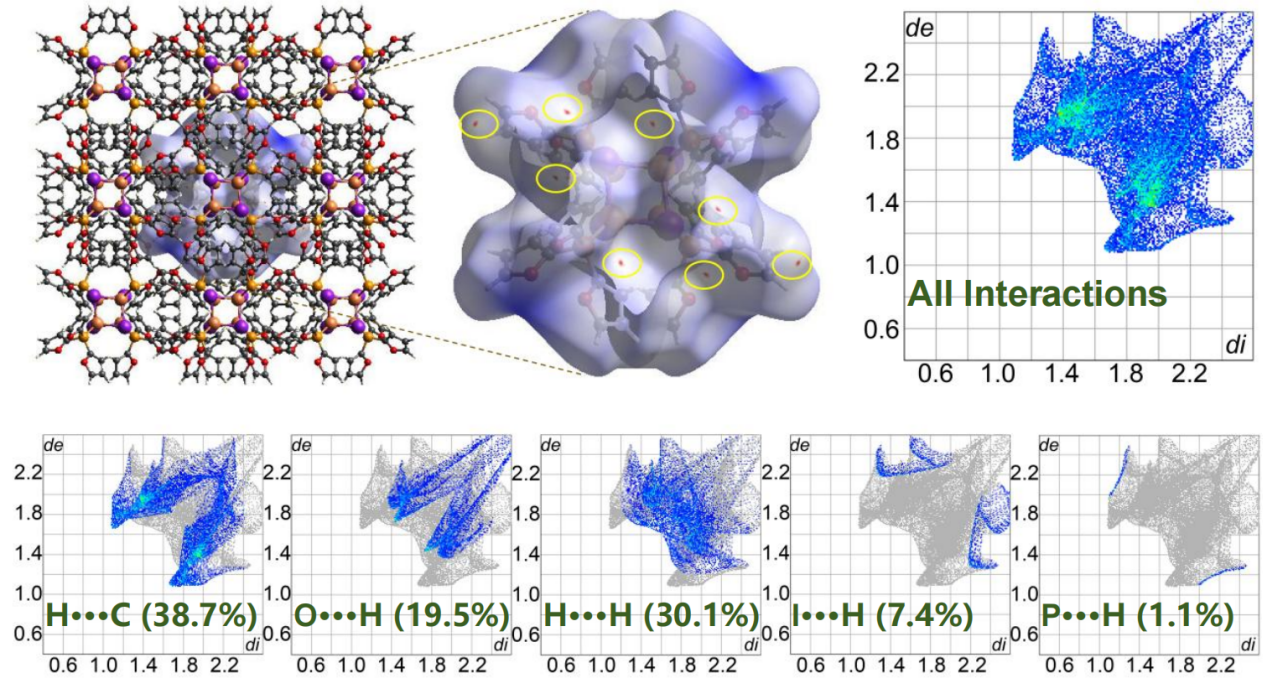


Figure S6. Hirshfeld surfaces of Cu4I4(TFP)4: Simulation of a Hirshfeld surface of one building block; 2D fingerprint plot generated by Hirshfeld surface; and relative contributions of various intermolecular interactions to the Hirshfeld surface ratio.

.

**Table S2** Summary of photophysical of Cu4I4(TFP)3CH3CN and Cu4I4(TFP)4.

| Compound | Λ77K (delay) (nm) | λ300K (nm) | ∆*E*ST (eV) |
| --- | --- | --- | --- |
| Cu4I4(TFP)3CH3CN | 540 | 555 | 0.0624 |
| Cu4I4(TFP)4 | 535 | 562 | 0.112 |

PLQY = 92.9%

Figure S7. PLQY of Cu4I4(TFP)3CH3CN.

Figure S8. The Emission spectra of Cu4I4(TFP)3CH3CN crystals at 77 K and 300 K.

Figure S9 Time-resolved PL (TRPL) of Cu4I4(TFP)4 at 77K.

77 K

τ = 76.1 ㎲

Figure S10 Time-resolved PL (TRPL) of Cu4I4(TFP)3CH3CN at 77K.


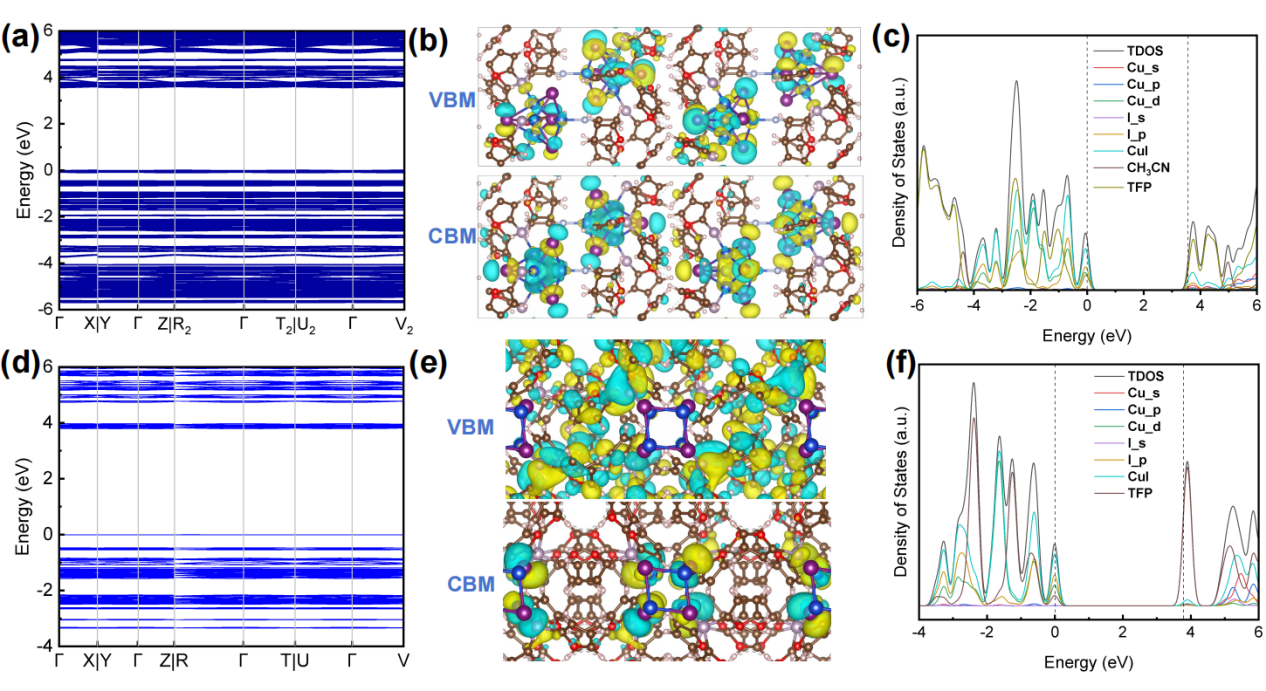


Figure S11. Calculated electronic band structure along high-symmetry k-point paths, indicating a band gap, VBM/CBM and calculated total and partial DOS for (a–c) Cu4I4(TFP)3CH3CN and (d–f) Cu4I4(TFP)4.


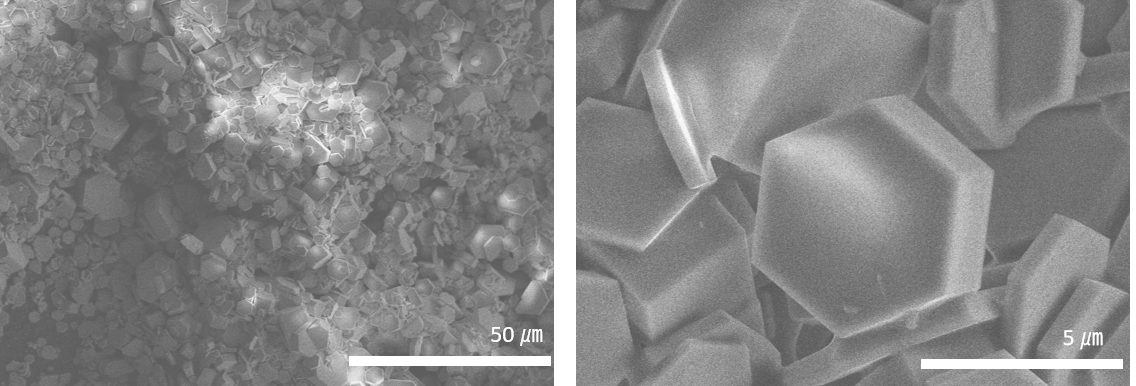


Figure S12. SEM images of Cu4I4(TFP)3CH3CN microcrystals.


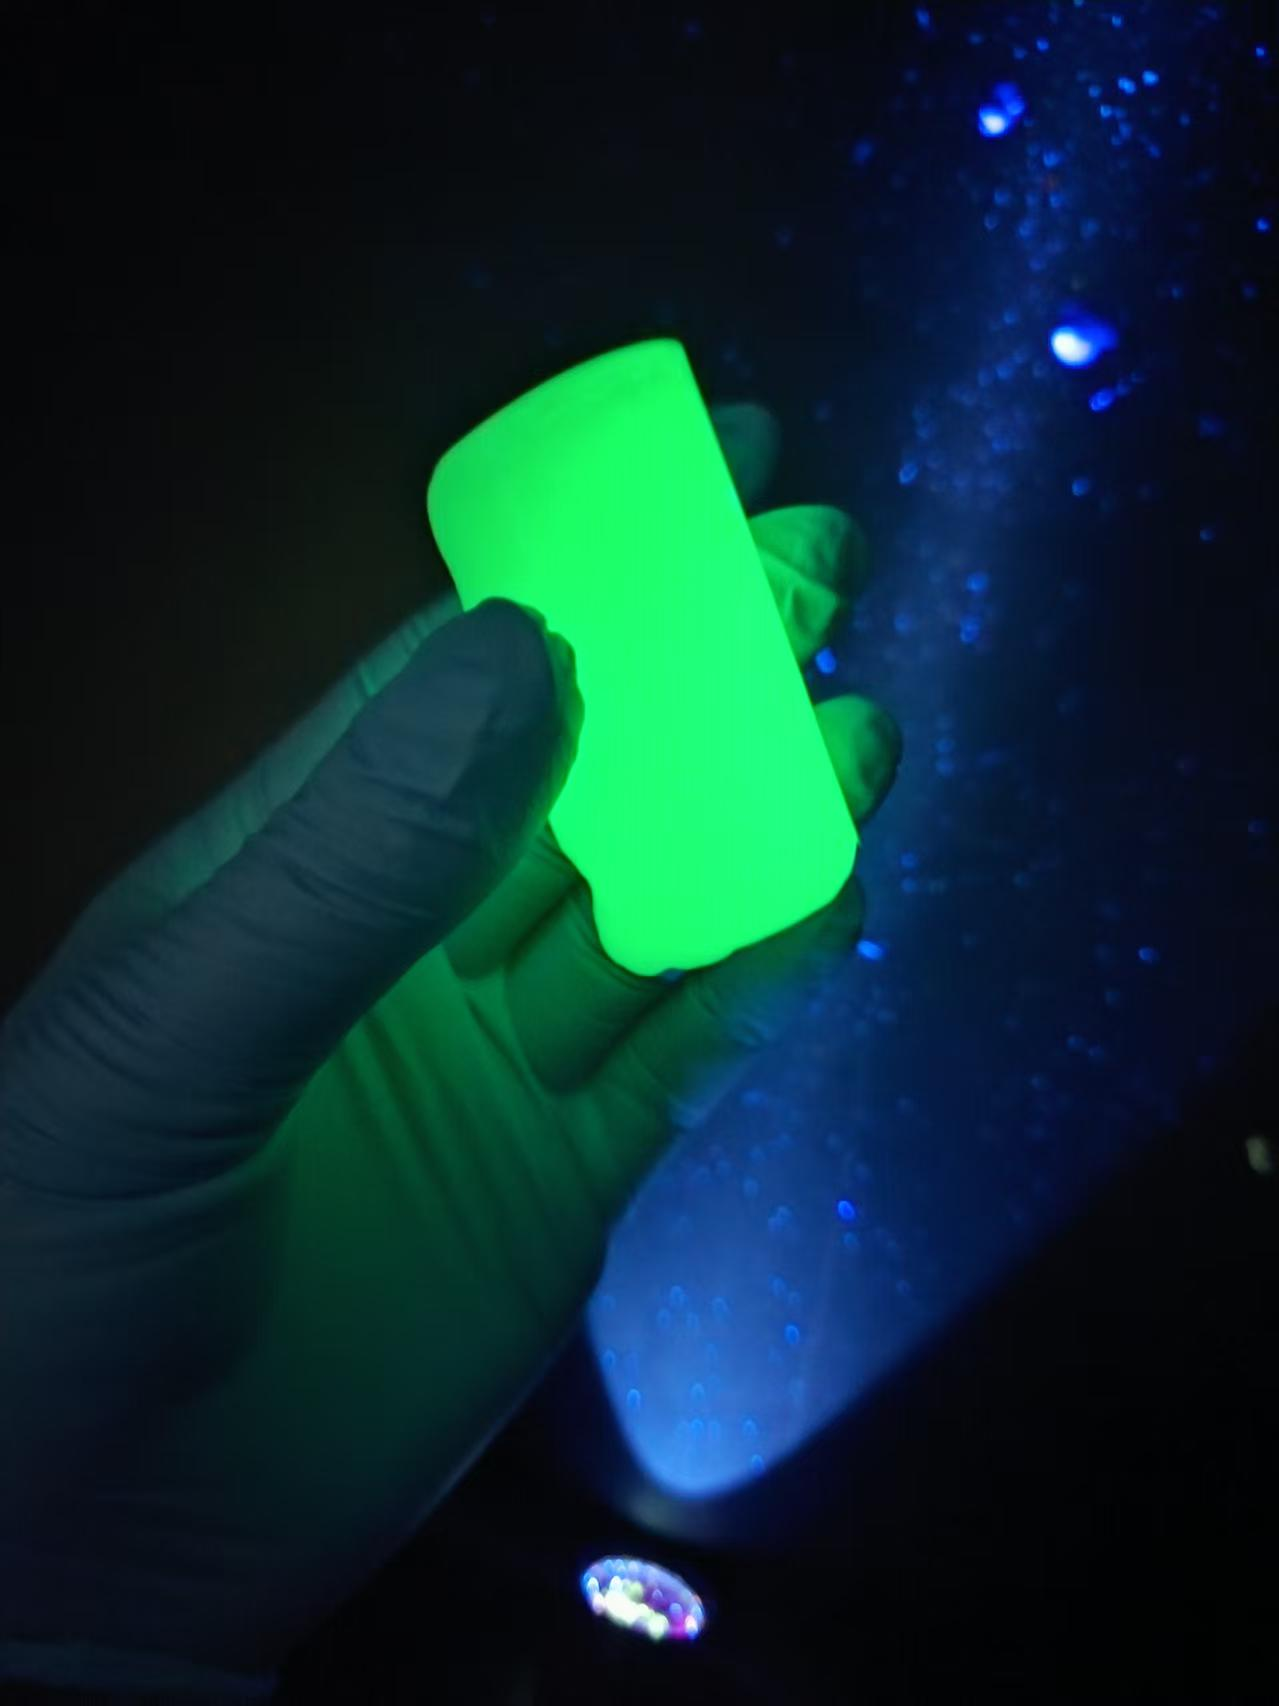


Figure S13. Under ultraviolet (UV) light, the Cu4I4(TFP)3CH3CN microcrystals scintillation screen emitted bright green light.


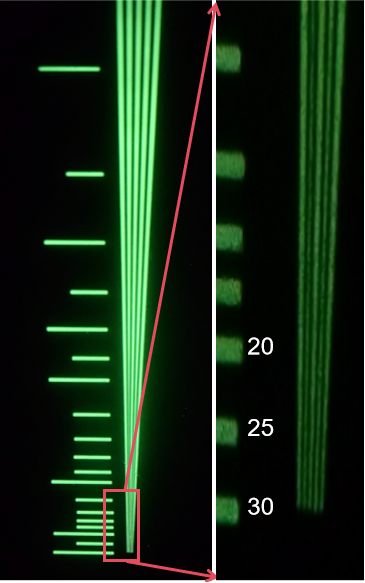


Figure S14. X-ray images of a standard resolution test pattern plate based on the Cu4I4(TFP)3CH3CN microcrystals scintillation screen.


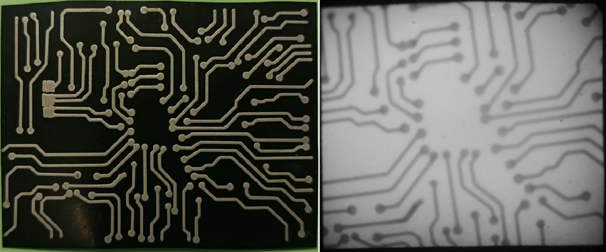


Figure S15. X-ray radiograph of an electronic chip obtained using a scintillator screen fabricated from Cu4I4(TFP)3CH3CN microcrystals.


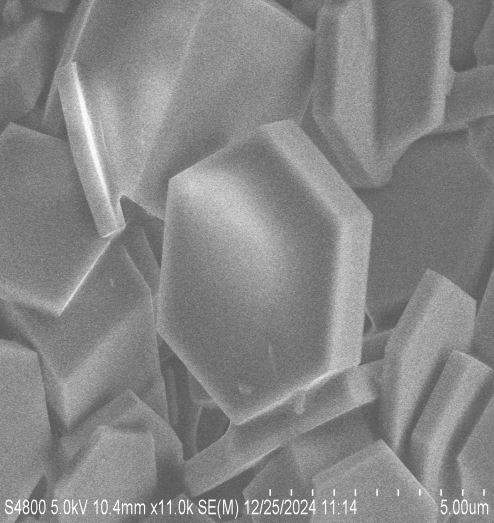


5 ㎛


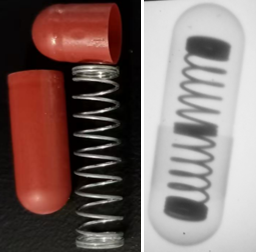


Figure S16. A photo of the metal spring and capsule (left) and X-ray image (right).


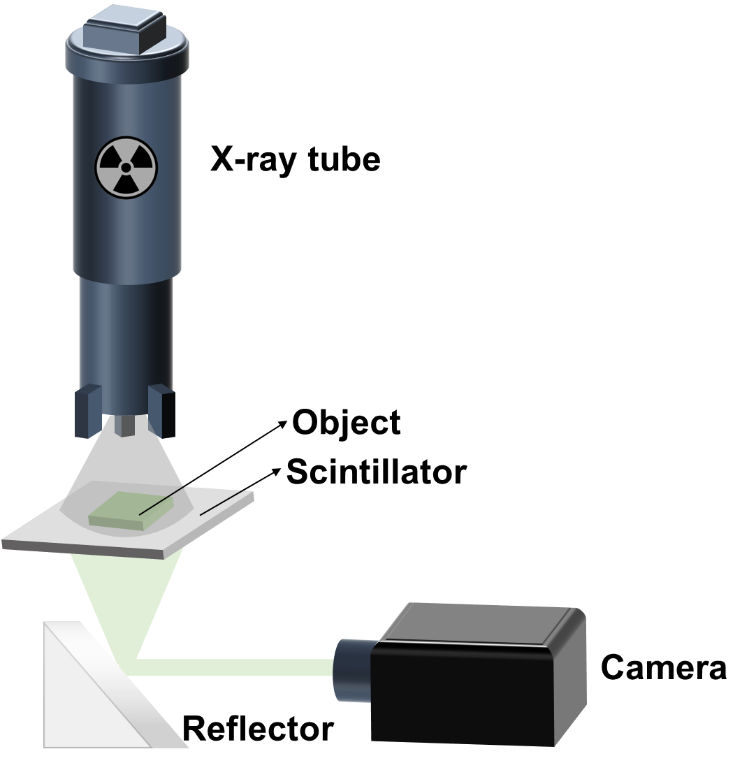


Figure S17. The spatial distribution diagram of optical imaging system.

**References**

S1. Ju, D.; Zhou, M.; Ran, P.; Li, H.; Yang, Y. M.; Jiang, T. Melt-Processable and Thermally Driven Self-Healing Luminescent Cu(I) Hybrid Metal Halides. *ACS Mater. Lett*. **2023**, *5*, 2978-2986.

S2. Zhao, W.; Wang, Y.; Guo, Y.; Suh, Y. D.; Liu, X. Color-Tunable and Stable Copper Iodide Cluster Scintillators for Efficient X-Ray Imaging. *Adv. Sci*. **2022**, *10*, 2205526.

S3. Li, B.; Jin, J.; Liu, X.; Yin, M.; Zhang, X.; Xia, Z.; Xu, Y. Multiphase Transformation in Hybrid Copper(I)-Based Halides Enable Improved X-ray Scintillation and Real-Time Imaging. *ACS Mater. Lett*. **2024**, *6*, 1542-1548.

S4. Zink, D. M.; Volz, D.; Baumann, T.; Mydlak, M.; Flügge, H.; Friedrichs, J.; Nieger, M.; Bräse, S. Heteroleptic, Dinuclear Copper(I) Complexes for Application in Organic Light-Emitting Diodes. *Chem. Mater.* **2013**, *25*, 4471-4486.

S5. Zink, D. M.; Bächle, M.; Baumann, T.; Nieger, M.; Kühn, M.; Wang, C.; Klopper, W.; Monkowius, U.; Hofbeck, T.; Yersin, H.; Bräse, S. Synthesis, Structure, and Characterization of Dinuclear Copper(I) Halide Complexes with P̂N Ligands Featuring Exciting Photoluminescence Properties. *Inorg. Chem*. **2013**, *52*, 2292-2305.
