# Supplementary material
Source: Research Square preprint supplement (doi:10.21203/rs.3.rs-9170631/v1)
Supplement: Supplementary file 2 [file 9fa9bc7ee26b0750268223bd.docx]

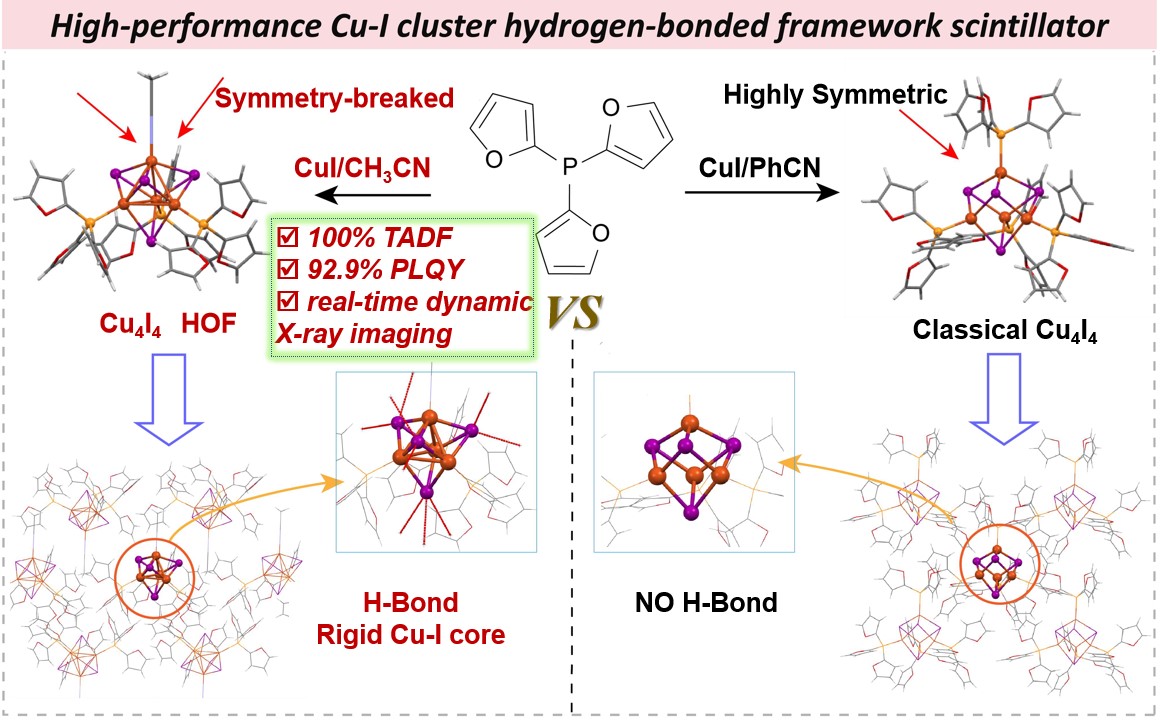


Symmetry-broken cubane exhibits a near-unity PLQY of 92.9% and a single-exponential lifetime of 3.77 μs, delivering a remarkable radioluminescence (RL) light yield of 59819 photons MeV-1 and a low detection limit of 51.2 nGy s-1. This concept is compatible with scalable processing, as evidenced by the formation of flexible microcrystal-based screens that maintain high imaging fidelity under static, tomographic, and dynamic operating modes.
